# Supplementary material
Source: PubMed Central journal article supplement (PMC3234663)
Supplement: supp_blood-2011-06-358226_TableS1.pdf [file supp_blood-2011-06-358226_TableS1.pdf]

| Pharmacologic Group | Reference Drug | Conversion Factors                    |
|---------------------|----------------|---------------------------------------|
| Anthracyclines      | Doxorubicin    | 50 mg/m <sup>2</sup> doxorubicin      |
|                     |                | = 60 mg/m <sup>2</sup> daunorubicin   |
|                     |                | = 75 mg/m <sup>2</sup> epirubicin     |
|                     |                | = 10 mg/m <sup>2</sup> idarubicin     |
|                     |                | = 12.5 mg/m <sup>2</sup> mitoxantrone |
